# Supplementary material
Source: PubMed Central journal article supplement (PMC4356761)
Supplement: AAC.05052-14_zac004153829so1.pdf [file AAC.05052-14_zac004153829so1.pdf]

## Supplemental Material

**FIG S1 MALDI-TOF mass spectrometry of negative control strain W3110 *pmrA*<sup>-</sup>.** This strain serves as a negative control for the W3110 *pmrD*<sup>-</sup> strain. **(A,B)** W3110 *pmrA*<sup>-</sup> produces hexa-acylated lipid A in both 10  $\mu$ M (low) and 10 mM (high)  $Mg^{2+}$  growth conditions, generating major peaks at  $m/z$  1797.0 and  $m/z$  1796.4, respectively. Minor peaks at  $m/z$  1717.1 (low)/1717.5 (high) and  $m/z$  1769.1 (low)/1768.4 (high) correspond to lipid A species lacking a phosphate group or bearing a shorter acyl chain, respectively.

**FIG S2 *pmrD* impacts transcription of *pmrA* and its downstream genes.** Relative gene expression of *pmrA*, *arnT*, *eptA*, *pmrD* and *rstA* when *E. coli* W3110 wild-type and *pmrD* mutant were grown in N-minimal medium with 10  $\mu$ M  $Mg^{2+}$  (low). Results are representative of 3 technical replicates.

Table S1 – Docx  
Strains and plasmids used in this study.

Table S2 – Docx  
Oligonucleotides used in this study.

Table S3 – Docx  
Densitometry analysis values for Figure 4.

Table S4 – Excel  
RNAseq data High vs. Low  $Mg^{2+}$  Replicates 1 and 2, wild-type

Table S5 – Excel  
RNAseq data High vs. Low  $Mg^{2+}$  Replicates 1 and 2, *pmrD*<sup>-</sup>

**A. W3110 *pmrA*<sup>-</sup> Low Mg<sup>2+</sup>**

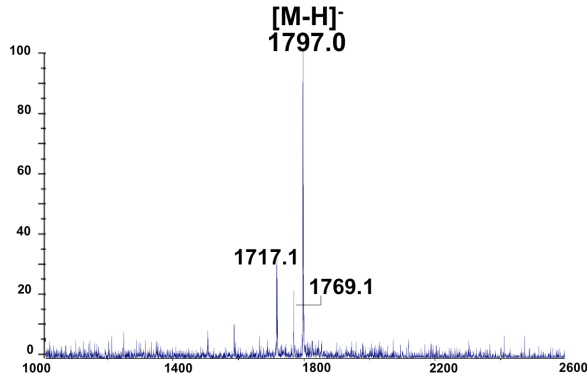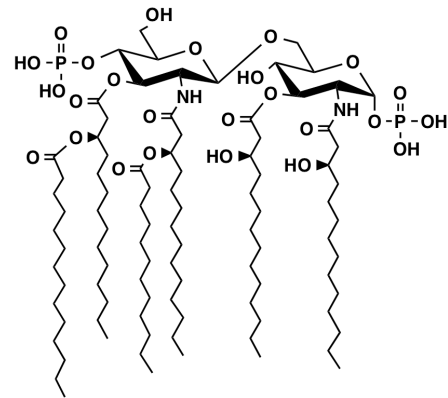

Exact mass:  
1797.2

**B. W3110 *pmrA*<sup>-</sup> High Mg<sup>2+</sup>**

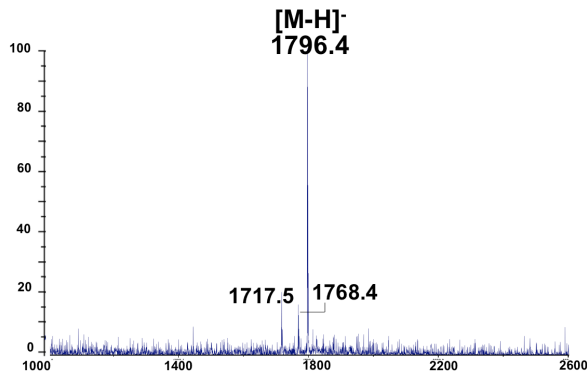

**FIG S1 MALDI-TOF mass spectrometry of negative control strain W3110 *pmrA*<sup>-</sup>.** This strain serves as a negative control for the W3110 *pmrD*<sup>-</sup> strain. **(A,B)** W3110 *pmrA*<sup>-</sup> produces hexa-acylated lipid A in both 10 $\mu$ M (low) and 10mM (high) Mg<sup>2+</sup> growth conditions, generating major peaks at *m/z* 1797.0 and *m/z* 1796.4, respectively. The peaks at *m/z* 1717.1 (low Mg<sup>2+</sup>) and *m/z* 1717.5 (high Mg<sup>2+</sup>) correspond to 1-dephosphorylated hexa-acylated lipid A, and *m/z* 1769.1 (low Mg<sup>2+</sup>) and *m/z* 1768.4 (high Mg<sup>2+</sup>) to loss of an ethylene group.

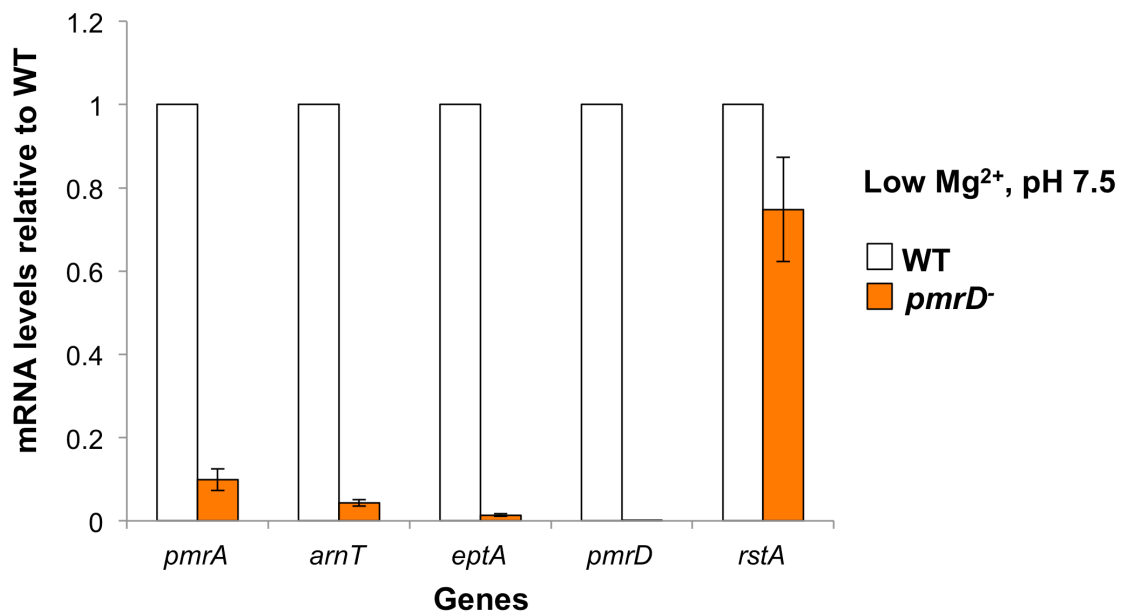

**FIG S2 *pmrD* impacts transcription of *pmrA* and its downstream genes.** Relative gene expression of *pmrA*, *arnT*, *eptA*, *pmrD* and *rstA* when *E. coli* W3110 wild-type and *pmrD* mutant were grown in N-minimal medium with 10 $\mu$ M Mg<sup>2+</sup> (low). Results are representative of 3 technical replicates.

**Table S1.** Strains and plasmids used in this study.

| Strains                                                                    | Genotype or Description                                                                                            | Source or Reference                        |
|----------------------------------------------------------------------------|--------------------------------------------------------------------------------------------------------------------|--------------------------------------------|
| W3110                                                                      | Wild type, F <sup>-</sup> rph-1 INV( <i>rrmD</i> , <i>rrnE</i> ) 1 <i>rph</i> -1                                   | <i>E. coli</i> genetic stock center (Yale) |
| W3110 <i>pmrD</i> :: <i>kan</i>                                            | W3110 containing kanamycin cassette at <i>pmrD</i>                                                                 | This work                                  |
| W3110 <i>pmrD</i> :: <i>kan</i> + <i>pmrD</i>                              | W3110 <i>pmrD</i> - complemented with pWSK29 <i>pmrD</i>                                                           | This work                                  |
| W3110 <i>phoPQ</i> :: <i>cam</i>                                           | W3110 containing chloramphenicol cassette at <i>phoPQ</i>                                                          | This work                                  |
| W3110 <i>phoPQ</i> :: <i>cam</i> , <i>pmrD</i> :: <i>kan</i>               | W3110 <i>phoPQ</i> - containing kanamycin cassette at <i>pmrD</i>                                                  | This work                                  |
| W3110 <i>phoPQ</i> :: <i>cam</i> , <i>pmrD</i> :: <i>kan</i> + <i>pmrD</i> | W3110 <i>phoPQpmrD</i> - expressing pWSK29 <i>pmrD</i>                                                             | This work                                  |
| W3110 $\Delta$ <i>pmrA</i>                                                 | W3110 with <i>pmrA</i> deleted, no marker                                                                          | This work                                  |
| W3110 $\Delta$ <i>pmrA</i> + <i>pmrD</i>                                   | W3110 <i>pmrA</i> - expressing pWSK29 <i>pmrD</i>                                                                  | This work                                  |
| MG1655                                                                     | F <sup>-</sup> , lambda <sup>-</sup> , <i>rph</i> -1                                                               | Gift from S. Payne                         |
| MG1655 <i>pmrD</i> :: <i>kan</i>                                           | MG1655 containing kanamycin cassette at <i>pmrD</i>                                                                | This work                                  |
| MG1655 <i>pmrD</i> :: <i>kan</i> + <i>pmrD</i>                             | MG1655 <i>pmrD</i> - complemented with pWSK29 <i>pmrD</i>                                                          | This work                                  |
| WD101                                                                      | W3110 constitutive <i>pmrA</i> mutant, polymyxin B resistant                                                       | (1)                                        |
| EHEC EDL 933                                                               | Serotype O157:H7                                                                                                   | ATCC                                       |
| ETEC H10407                                                                | Serotype O78:H11                                                                                                   | ATCC                                       |
| XL1-Blue                                                                   | <i>recA1 endA1 gyrA96 thi-1 hsdR17 supE44 relA1 lac</i> [F' <i>proAB lacIqZ</i> $\Delta$ <i>M15</i> ::Tn10 (Tetr)] | Stratagene                                 |
| Plasmids                                                                   |                                                                                                                    |                                            |
| pET21a                                                                     | Vector containing a T7 promoter; Amp resistance                                                                    | Novagen                                    |
| pET21a <i>pmrD</i>                                                         | pET21a containing W3110 <i>pmrD</i> coding sequence                                                                | This work                                  |
| pWSK29                                                                     | Low copy vector containing T7 and T3 RNA polymerase promoters; Amp resistance                                      | (2)                                        |
| pWSK29 <i>pmrD</i>                                                         | pWSK29 containing W3110 <i>pmrD</i> coding sequence plus ribosome binding site                                     | This work                                  |
| pWSK29EHEC <i>pmrD</i>                                                     | pWSK29 containing EHEC <i>pmrD</i> coding sequence plus ribosome binding site                                      | This work                                  |
| pWSK29ETEC <i>pmrD</i>                                                     | pWSK29 containing ETEC <i>pmrD</i> coding sequence plus ribosome binding site                                      | This work                                  |

1. **Trent MS, Ribeiro AA, Lin S, Cotter RJ, Raetz CR.** 2001. An inner membrane enzyme in *Salmonella* and *Escherichia coli* that transfers 4-amino-4-deoxy-L-arabinose to lipid A: induction on polymyxin-resistant mutants and role of a novel lipid-linked donor. *J. Biol. Chem.* **276**:43122–43131.
2. **Wang RF, Kushner SR.** 1991. Construction of versatile low-copy-number vectors for cloning, sequencing and gene expression in *Escherichia coli*. *Gene* **100**:195–199.

**Table S2.** Oligonucleotides used in this study.

| Primer            | Sequence                                                                        | Restriction Site |
|-------------------|---------------------------------------------------------------------------------|------------------|
| 1 ECpmrDF_Ndel    | GCGCGCCATATGGAATGGCTGGTCAAAAAA                                                  | Ndel             |
| 2 ECpmrDR_BamHI   | GCGCGCGGATCCTTACTGAGTTTTCCCTGC                                                  | BamHI            |
| 3 pmrDkeiocheck_R | GAGTGGGTGCAACGTCAGCAA                                                           | -                |
| 4 pmrAkeiocheck_R | GCTGCGGATGATATTCTGCAA                                                           | -                |
| 5 pmrBkeiocheck_R | TTTGGCTATATGCTGGTCGCG                                                           | -                |
| 6 k1 (1)          | CAGTCATAGCCGAATAGCCT                                                            | -                |
| 7 GyrBF           | ACGCTGCTGTTGACCTTCTT                                                            | -                |
| 8 GyrBR           | TCCTGCTTGCCTTTCTTCAC                                                            | -                |
| 9 PmrDF           | ATGGAATGGCTGGTCAAAAA                                                            | -                |
| 10 PmrDR          | CATTCTGCAAAGGCGAGAGT                                                            | -                |
| 11 EptAF          | CAGCGACTGGCAAATCT                                                               | -                |
| 12 EptAR          | TAGTTTCACGCGGGTAGC                                                              | -                |
| 13 PmrAF          | GGGCGGTGAAGAGTTGATT                                                             | -                |
| 14 PmrAR          | TTGGTCGAGGGTTCATTGTC                                                            | -                |
| 15 ArnTF          | TCAGCCAAGCCGCTATATTC                                                            | -                |
| 16 ArnTR          | ATCACCGCTGACAAATCTCC                                                            | -                |
| 17 RstAF          | GTGGAAGATGATGCGGAAGT                                                            | -                |
| 18 RstAR          | CCTGGTAGCATGATGTGCGAGT                                                          | -                |
| 19 PhoP1          | ATAATCGCGTTACACTATTTTAATAATTAAGAC<br>AGGGAGAAATAAAAATGTGTAGGCTGGAGCT<br>GCTTCG  | -                |
| 20 PhoQP2         | TTAACGTAATGCGTGAAGTATGGGCATATTTA<br>TTCATCTTTTCGGCGCAGAATGGGAATTAGCCA<br>TGGTCC | -                |

1. **Datsenko KA, Wanner BL.** 2000. One-step inactivation of chromosomal genes in *Escherichia coli* K-12 using PCR products. *Proc. Natl. Acad. Sci. U. S. A.* **97**:6640–6645.

**Table S3.** Densitometry analysis values for Figure 4.

|                                     | <b>% Modified<sup>a</sup></b> | <b>% Unmodified<sup>b</sup></b> |
|-------------------------------------|-------------------------------|---------------------------------|
| <b>WD101</b>                        | 98.52                         | 1.48                            |
| <b>WT</b>                           | 89.42                         | 10.58                           |
| <b>phoPQ<sup>-</sup></b>            | 40.06                         | 59.94                           |
| <b>phoPQD<sup>-</sup></b>           | 5.49                          | 94.51                           |
| <b>phoPQpmrD<sup>-</sup> + pmrD</b> | 90.56                         | 9.44                            |
| <b>pmrA<sup>-</sup></b>             | 1.28                          | 98.72                           |
| <b>pmrA<sup>-</sup> + pmrD</b>      | 1.08                          | 98.92                           |

<sup>a</sup> “% modified” refers to percentage of radiolabeled lipid A species in each strain profile containing pETN or L-Ara4N additions

<sup>b</sup> “% unmodified” refers to percentage of radiolabeled lipid A species in each strain profile that are unmodified hexa-acylated *bis*-phosphorylated lipid A
